# Supplementary material
Source: Springer Nature journal article supplement (https://www.springermedizin.de/resource/supplementary/12955_2009_609_MOESM1_ESM.pdf/9560816)
Supplement: MOESM1 [file 9560816]

## OPERATIONS COMMITTEE

Research co-ordinators  
Content expert  
Clinical experts

### UK

Clinical expert  
Cognitive debriefer

### France

Clinical expert  
Cognitive debriefer

### Germany

Clinical expert  
Cognitive debriefer

### Uruguay

Clinical expert  
Cognitive debriefer

## CROSS CULTURAL TRANSLATION

Single forward translation by clinical expert  
Single back translation by professional translator  
Reconciliation of final translation by operations committee and local team in each country

## COGNITIVE DEBRIEFING TRAINING

Face-to-face meeting with all local teams for cognitive debriefing training with experts from operations committee

## COGNITIVE DEBRIEFING

Cognitive debriefing conducted in each of the local centers  
Include 10 children and their parents  
Teleconference with operations committee after every 3 debriefings to discuss issues

## INTERNATIONAL CONSENSUS MEETING

Meeting of entire group  
Results of cognitive debriefings discussed  
Final translated version for each country agreed upon
